# Supplementary material
Source: PubMed Central journal article supplement (PMC4528762)
Supplement: supp_pp.15.00594_PP2015-00594R1_Supplemental_Material.pdf [file supp_pp.15.00594_PP2015-00594R1_Supplemental_Material.pdf]

## Figure S1

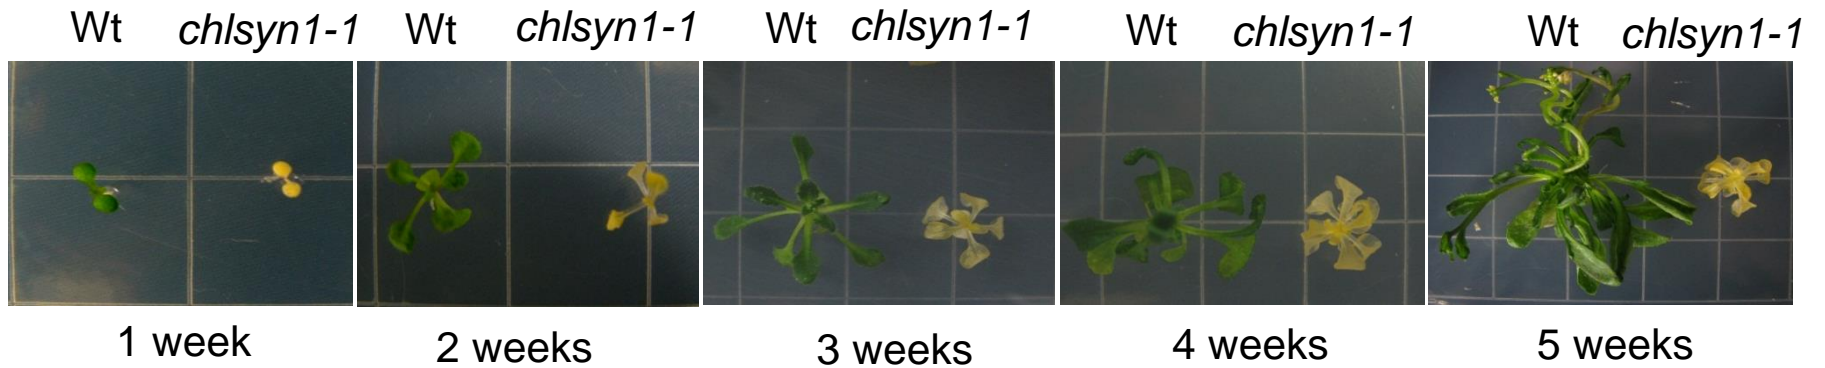

**Figure S1.** Morphologies of Col-0 plants and Arabidopsis null mutant *chlsyn1-1* (SALK\_134433) with ages of growth arranged from 1- to 5- week-old. Plants were grown in MS medium.

Figure S2

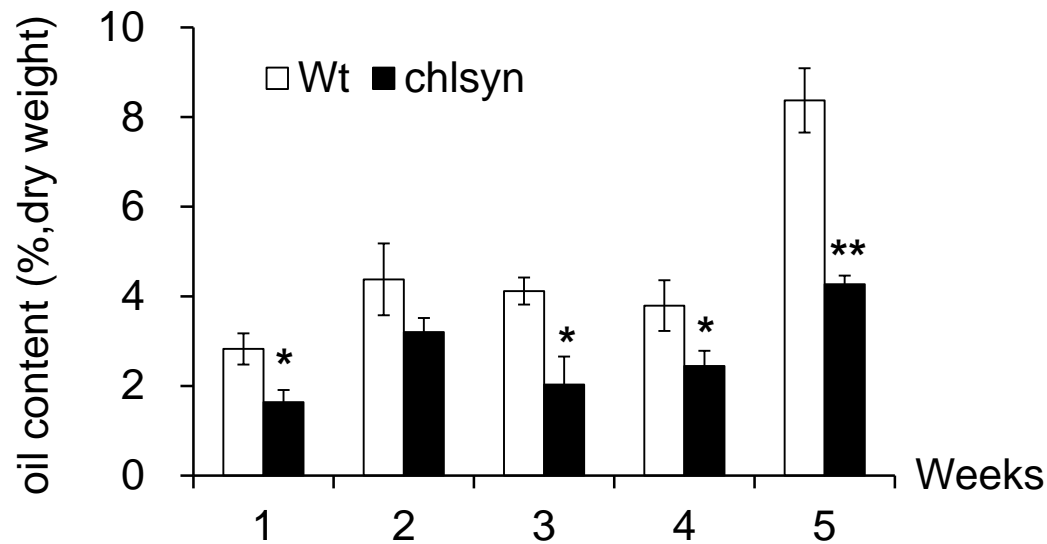

**Figure S2.** Accumulation of total fatty acids in leaves from Col-0 wild type plants and plants of null mutant *chlsyn1-1* sampled at 1- to 5-weeks of age. Data represent mean  $\pm$  SE of three independent biological replicates. \*\*P<0.01, \*P<0.05, Student's *t*-test.
